1 **A Reptilian Endogenous Foamy Virus Sheds Light on the Early Evolution**  
2 **of Retroviruses**

3

4 Xiaoman Wei<sup>1,2†</sup>, Yicong Chen<sup>1,2†</sup>, Guangqian Duan<sup>2</sup>, Edward C. Holmes<sup>3</sup>, Jie Cui<sup>1\*</sup>

5

6

7 <sup>1</sup>Key Laboratory of Special Pathogens and Biosafety, Center for Emerging Infectious Diseases,  
8 Wuhan Institute of Virology, Chinese Academy of Sciences, Wuhan 430071, China.

9 <sup>2</sup>University of Chinese Academy of Sciences, Beijing 100049, China.

10 <sup>3</sup>Marie Bashir Institute for Infectious Diseases and Biosecurity, School of Life and  
11 Environmental Sciences and Faculty of Medicine and Health, University of Sydney, Sydney,  
12 NSW 2006, Australia.

13

14 <sup>†</sup>These authors contributed equally to this work.

15 <sup>\*</sup>Corresponding author: E-mail: [jiecui@wh.iov.cn](mailto:jiecui@wh.iov.cn)

16 **Abstract**

17 Endogenous retroviruses (ERVs) can be thought of as host genomic fossils of ancient viruses.  
18 Foamy viruses, including those that form endogenous copies, provide strong evidence for  
19 virus-host co-divergence across the vertebrate phylogeny. Endogenous foamy viruses (EFV)  
20 have previously been discovered in mammals, amphibians and fish. Here we report a novel  
21 endogenous foamy virus, named SpuEFV, in genome of the tuatara (*Sphenodon punctatus*),  
22 an endangered reptile species endemic to New Zealand. Phylogenetic analyses revealed that  
23 SpuEFV has likely co-diverged with its host over a period of many millions of years. The  
24 discovery of SpuEFV fills a major gap in the fossil record of foamy viruses and provides  
25 important insights into the early evolution of retroviruses.

26

27 **Key words:** endogenous retroviruses; foamy virus; reptiles; evolution; tuatara

28

## 29 **Introduction**

30 Retroviruses (family *Retroviridae*) are viruses of major medical significance as some are  
31 associated with severe infectious disease or are oncogenic (Hayward, et al. 2015; Aiewsakun  
32 and Katzourakis 2017; Xu, et al. 2018). Retroviruses are also of note because of their ability  
33 to integrate into the host germ-line, generating endogenous retroviruses (ERVs) that then  
34 exhibit Mendelian inheritance (Stoye 2012; Johnson 2015). ERVs are widely distributed in  
35 vertebrates (Hayward, et al. 2013; Cui, et al. 2014; Hayward, et al. 2015; Xu, et al. 2018) and  
36 constitute important molecular “fossils” for the study of retrovirus evolution. ERVs related to  
37 all seven major retroviral genera have been described, although some of the more complex  
38 retroviruses, such as lenti-, delta- and foamy viruses, rarely appear as endogenous copies.

39

40 As well as being agents of disease, foamy viruses are of importance because of their  
41 long-term virus-host co-divergence (Switzer, et al. 2005). Endogenous foamy viruses (EFVs),  
42 first discovered in sloths (class Mammalia) (Katzourakis, et al. 2009) also exhibit  
43 co-divergence pattern with their hosts; and they have also been reported in primates and the  
44 Cape golden mole (Han and Worobey 2012b, 2014). The discovery of a EFV in the  
45 coelacanth genome indicated that foamy viruses could have an ancient evolutionary history  
46 (Han and Worobey 2012a), likely co-diverging with their vertebrate hosts over time-scales of  
47 hundreds of million years (Aiewsakun and Katzourakis 2017). Although EFVs or foamy-like  
48 elements have been reported in fish, amphibians and mammals, they have currently not been  
49 reported in genomes of two other major classes of vertebrates - reptiles and birds (Tristem, et  
50 al. 1995; Hayward, et al. 2015; Xu, et al. 2018).

51

## 52 **Materials and Methods**

### 53 **Genomic mining and consensus genome construction**

54 To identify foamy viruses in reptiles, the TBLASTN program (Altschul, et al. 1990) was used  
55 to screen relevant taxa from 28 reptile genomes (Supplementary Table S1) and 130 bird  
56 genomes (Supplementary Table S2) (as of October 2018) downloaded from GenBank  
57 ([www.ncbi.nlm.nih.gov/genbank](http://www.ncbi.nlm.nih.gov/genbank)). In each case, the amino acid sequences of the Pol genes of  
58 representative EFVs (endogenous foamy viruses), endogenous foamy-like viruses, and  
59 exogenous foamy viruses were chosen as queries. As filters to identify significant and  
60 meaningful hits, we chose sequences with more than 30% amino acid identity over a 30%  
61 region, with an e-value set to 0.00001. Genomes that contained only single hits for EFVs  
62 were excluded as likely false-positives. We extended viral flanking sequences of the hits to  
63 identify the 5'- and 3'-LTRs using LTR finder (Xu and Wang 2007) and LTR harvest  
64 (Ellinghaus, et al. 2008). Sequences highly similar to foamy virus proteins found in tuatara  
65 were aligned to generate a SpuEFV consensus genome (Supplementary Table S5). Conserved  
66 domains were identified using CD-Search service in NCBI (Marchler-Bauer and Bryant  
67 2004).

68

### 69 **Phylogenetic analysis**

70 To determine the evolutionary relationship of EFVs and retroviruses, the Pol and Env protein  
71 sequences were aligned in MAFFT 7.222 (Katoh and Standley 2013) and confirmed  
72 manually in MEGA7 (Kumar, et al. 2016). The phylogenetic relationships among these  
73 sequences were then determined using the maximum-likelihood (ML) method in PhyML 3.1  
74 (Guindon, et al. 2010), incorporating 100 bootstrap replicates to determine node robustness.  
75 The best-fit models of amino acid substitution were determined by ProtTest 3.4.2 (Abascal, et  
76 al. 2005): RtREV+ $\Gamma$ +I for Pol, LG+ $\Gamma$ +I+F for concatenated gag, pol and env. All alignments  
77 used in the phylogenetic analyses can be found in Data set S1-S2.

78

## 79 **Results and Discussion**

### 80 **Discovery of foamy viral elements in reptile genomes**

81 To search for potential foamy (-like) viral elements in reptiles and birds, we collated 28  
82 reptilian genomes (Supplementary Table S1) and 130 bird genomes (Supplementary Table  
83 S2) and performed *in silico* TBLASTN with full-length Pol protein sequences of various  
84 foamy viruses, including EFVs, as screening probes (Supplementary Table S3). We only  
85 considered viral hits within long genomic scaffold (>20 kilobases in length) to be *bona fide*  
86 ERVs. This genomic mining identified 117 ERV hits in tuatara (*Sphenodon punctatus*) and  
87 none in bird genomes. Hence, a total of 117 ERV hits in the tuatara genome were extracted  
88 and subjected to evolutionary analysis (Supplementary Table S4). We named this new ERV  
89 as SpuEFV (*Sphenodon punctatus* endogenous foamy virus).

90

### 91 **Genomic organization**

92 We extracted all significant SpuEFV viral elements and constructed a consensus genomic  
93 sequence of SpuEFV (Supplementary Fig. S1, Table S5). The consensus genome harbored a  
94 pairwise long terminal repeats (LTRs) and exhibits a typical spuma virus structure, encoding  
95 three mainly open reading frames (ORF) – *gag*, *pol* and *env* – and one putative additional  
96 accessory genes, ORF1 (Fig. 1). Interestingly, this accessory ORF 1 exhibit no sequence  
97 similarity to known foamy accessory genes. Notably, by searching the Conserved Domains  
98 Database ([www.ncbi.nlm.nih.gov/Structure/cdd](http://www.ncbi.nlm.nih.gov/Structure/cdd)), we identified three typical foamy conserved  
99 domain for both consensus and one full-length original SpuEFV (Accession no.  
100 QEPC01003194.1): (i) Spuma virus Gag domain (pfam03276) (Winkler, et al. 1997), (ii)  
101 Spuma aspartic protease (A9) domain (pfam03539) which exists in all mammalian foamy  
102 virus pol protein (Aiewsakun and Katzourakis 2017), and (iii) foamy virus envelope protein

103 domain (pfam03408) (Han and Worobey 2012a) (Supplementary Fig. S2, Fig. S3),  
104 confirming that SpuEFV is indeed of foamy virus origin.

### 105 **Phylogenetic analysis**

106 The Pol (490 amino acids) of SpuEFVs were used for phylogenetic analysis. Our maximum  
107 likelihood (ML) phylogenetic trees revealed that the EFVs present in that tuatara genome  
108 formed a close monophyletic group within the foamy clade, indicative of a single origin, and  
109 with high bootstrap support (Fig. 2). The divergent phylogenetic position of SpuEFV is  
110 compatible with virus-host co-divergence for the entire history of the vertebrates. However, it  
111 is possible that this pattern will change with a larger sampling of taxa such that the EFV  
112 phylogeny expands. Failure to detect any SpuEFV related elements in the remaining reptilian  
113 genome screening suggests that the virus was not vertically transmitted among reptiles,  
114 although this will clearly need to be reassessed with a larger sample size.

115

116 Previous studies provided strong evidence for the co-divergence of foamy viruses and their  
117 vertebrate hosts over extended time-periods (Katzourakis, et al. 2009). That the reptilian  
118 SpuEFV newly described here seemingly follows the same pattern (Fig. 3) thereby implies  
119 that it could diverge from the other mammalian foamy viruses with its tuatara host more than  
120 320 million years ago (<http://www.timetree.org/>). As such, the discovery of SpuEFV fills a  
121 major gap in our knowledge of the evolutionary history of the foamy viruses and provides  
122 important insights into the early evolution of retroviruses.

123

### 124 **Acknowledgments**

125 J.C. is supported by National Natural Science Foundation of China (31671324) and CAS  
126 Pioneer Hundred Talents Program. ECH is supported by an ARC Australian Laureate  
127 Fellowship (FL170100022).

128

129 **Data availability**

130 All data needed to evaluate the conclusions in the paper are present in the paper and/or the  
131 Supplementary Materials. Additional data related to this paper may be requested from the  
132 authors.

133 **Conflict of interest:** None declare

134

135 **References**

- 136 Abascal F, Zardoya R, Posada D. 2005. ProtTest: selection of best-fit models of protein  
137 evolution. *Bioinformatics* 21:2104-2105.
- 138 Aiewsakun P, Katzourakis A. 2017. Marine origin of retroviruses in the early Palaeozoic Era.  
139 *Nat Commun* 8:13954.
- 140 Altschul SF, Gish W, Miller W, Myers EW, Lipman DJ. 1990. Basic local alignment search  
141 tool. *J Mol Biol* 215:403-410.
- 142 Cui J, Zhao W, Huang Z, Jarvis ED, Gilbert MT, Walker PJ, Holmes EC, Zhang G. 2014.  
143 Low frequency of paleoviral infiltration across the avian phylogeny. *Genome Biol* 15:539.
- 144 Ellinghaus D, Kurtz S, Willhoeft U. 2008. LTRharvest, an efficient and flexible software for  
145 de novo detection of LTR retrotransposons. *BMC Bioinformatics*.
- 146 Guindon S, Dufayard JF, Lefort V, Anisimova M, Hordijk W, Gascuel O. 2010. New  
147 algorithms and methods to estimate maximum-likelihood phylogenies: assessing the  
148 performance of PhyML 3.0. *Syst Biol* 59:307-321.
- 149 Han GZ, Worobey M. 2012a. An endogenous foamy-like viral element in the coelacanth  
150 genome. *PLoS Pathog* 8:e1002790.

- 151 Han GZ, Worobey M. 2012b. An endogenous foamy virus in the aye-aye (*Daubentonia*  
152 *madagascariensis*). *J Virol* 86:7696-7698.
- 153 Han GZ, Worobey M. 2014. Endogenous viral sequences from the Cape golden mole  
154 (*Chrysochloris asiatica*) reveal the presence of foamy viruses in all major placental mammal  
155 clades. *PLoS One* 9:e97931.
- 156 Hayward A, Cornwallis CK, Jern P. 2015. Pan-vertebrate comparative genomics unmasks  
157 retrovirus macroevolution. *Proc Natl Acad Sci U S A* 112:464-469.
- 158 Hayward A, Grabherr M, Jern P. 2013. Broad-scale phylogenomics provides insights into  
159 retrovirus-host evolution. *Proc Natl Acad Sci U S A* 110:20146-20151.
- 160 Johnson WE. 2015. Endogenous Retroviruses in the Genomics Era. *Annu Rev Virol*  
161 2:135-159.
- 162 Katoh K, Standley DM. 2013. MAFFT multiple sequence alignment software version 7:  
163 improvements in performance and usability. *Mol Biol Evol* 30:772-780.
- 164 Katzourakis A, Gifford RJ, Tristem M, Gilbert MT, Pybus OG. 2009. Macroevolution of  
165 complex retroviruses. *Science* 325:1512.
- 166 Kumar S, Stecher G, Tamura K. 2016. MEGA7: Molecular Evolutionary Genetics Analysis  
167 Version 7.0 for Bigger Datasets. *Mol Biol Evol* 33:1870-1874.
- 168 Marchler-Bauer A, Bryant SH. 2004. CD-Search: protein domain annotations on the fly.  
169 *Nucleic Acids Res* 32:W327-331.
- 170 Stoye JP. 2012. Studies of endogenous retroviruses reveal a continuing evolutionary saga.  
171 *Nat Rev Microbiol* 10:395-406.



172 Switzer WM, Salemi M, Shanmugam V, Gao F, Cong ME, Kuiken C, Bhullar V, Beer BE,  
173 Vallet D, Gautier-Hion A, et al. 2005. Ancient co-speciation of simian foamy viruses and  
174 primates. *Nature* 434:376-380.

175 Tristem M, Myles T, Hill F. 1995. A highly divergent retroviral sequence in the tuatara  
176 (*Sphenodon*). *Virology* 210:206-211.

177 Winkler I, Bodem J, Haas L, Zemba M, Delius H, Flower R, Flugel RM, Lochelt M. 1997.  
178 Characterization of the genome of feline foamy virus and its proteins shows distinct features  
179 different from those of primate spumaviruses. *J Virol* 71:6727-6741.

180 Xu X, Zhao H, Gong Z, Han GZ. 2018. Endogenous retroviruses of non-avian/mammalian  
181 vertebrates illuminate diversity and deep history of retroviruses. *PLoS Pathog* 14:e1007072.

182 Xu Z, Wang H. 2007. LTR\_FINDER: an efficient tool for the prediction of full-length LTR  
183 retrotransposons. *Nucleic Acids Res* 35:W265-268.

184

185

186

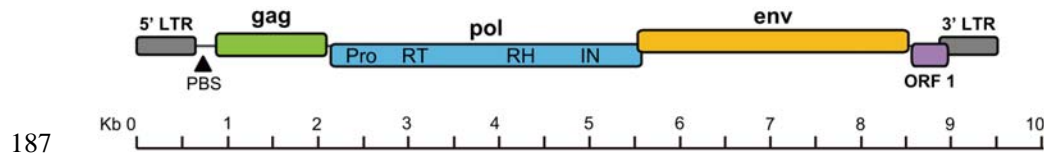

188 **Figure 1.** Genomic organizations of SpuEFV. LTR, long-terminal repeat; PBS,

189 primer-binding site; Pro, aspartic protease; RT, reverse transcriptase; RH, ribonuclease H; IN,

190 integrase.

191

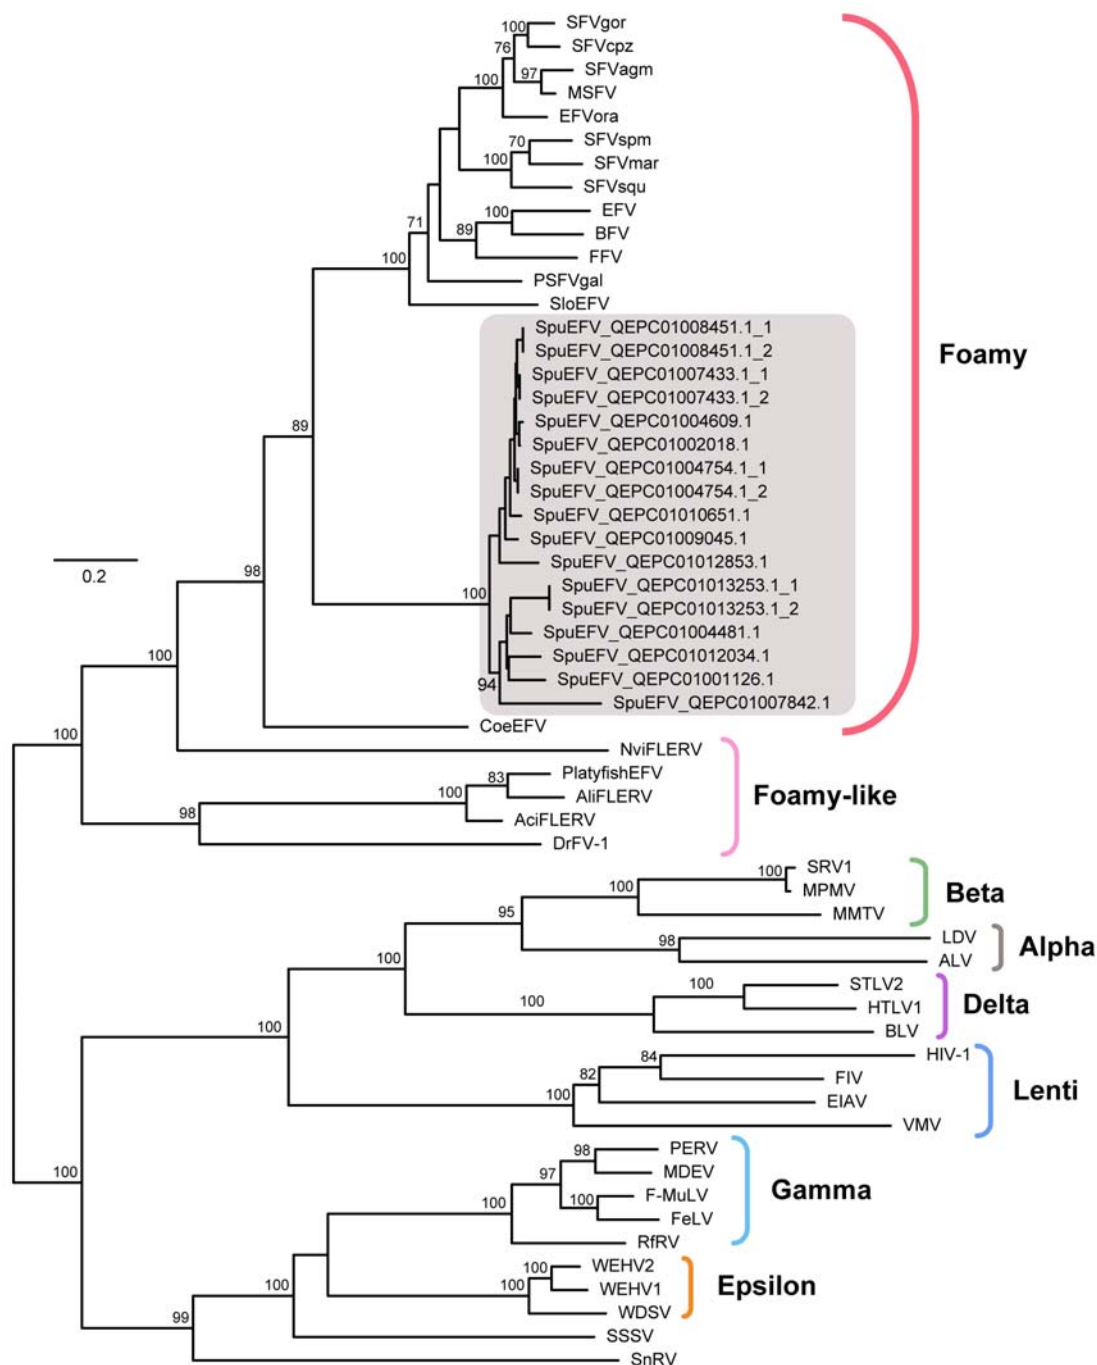

192

193 **Figure 2.** Phylogenetic tree of retroviruses, including SpuEFVs, inferred using amino acid  
 194 sequences of the Pol gene (490aa). The tree is midpoint rooted for clarity only. The newly  
 195 identified SpuEFVs are labelled using a grey-shaded box with their accession numbers  
 196 (different pol sequences in same contig are numbered in the suffix). The scale bar indicates

197 the number of amino acid changes per site. Bootstrap values <70% are not shown. The

198 alignment of pol amino acid sequences is provided in Data set S1.

199

200

201

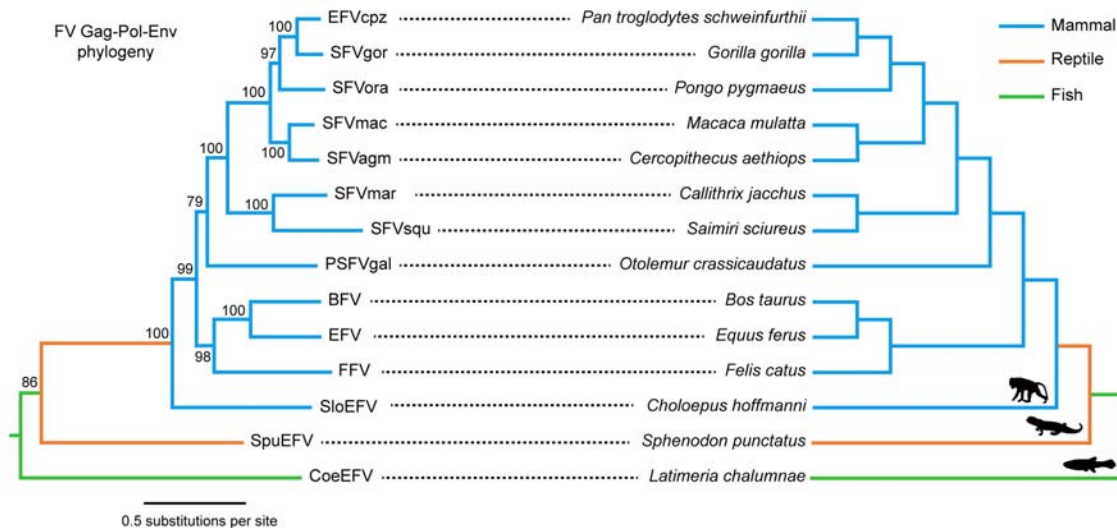

202

203 **Figure 3.** A simplified evolutionary relationship between foamy viruses (left) and their

204 vertebrate hosts (right). The scale bar on the virus phylogeny indicates number of amino acid

205 changes per site with bootstrap support values provided at each node. The alignment of FV

206 gag-pol-env amino acid sequences is provided in Data set S2.

207
